# Supplementary material for: Microbial effects of livestock manure fertilization on freshwater aquaculture ponds rearing tilapia (Oreochromis shiranus) and North African catfish (Clarias gariepinus)
Source: PubMed Central journal article supplement (PMC6291788; doi:10.1002/mbo3.716), 2018-08-31
Supplement: MBO3-7-e00716-s001.pdf [file MBO3-7-e00716-s001.pdf]

**a**

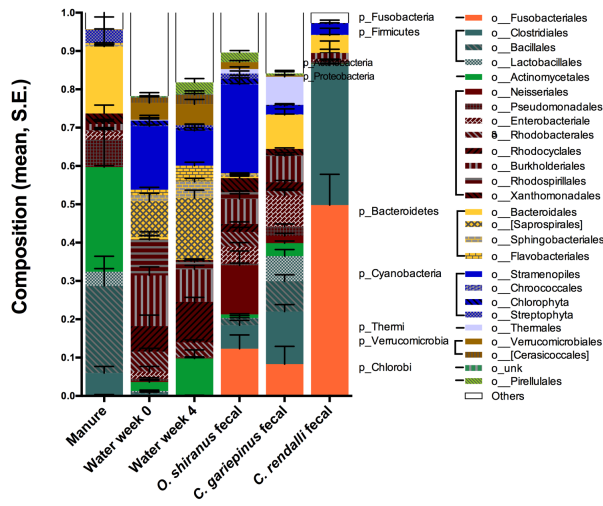

**b**

**Core Genera shared across groups**

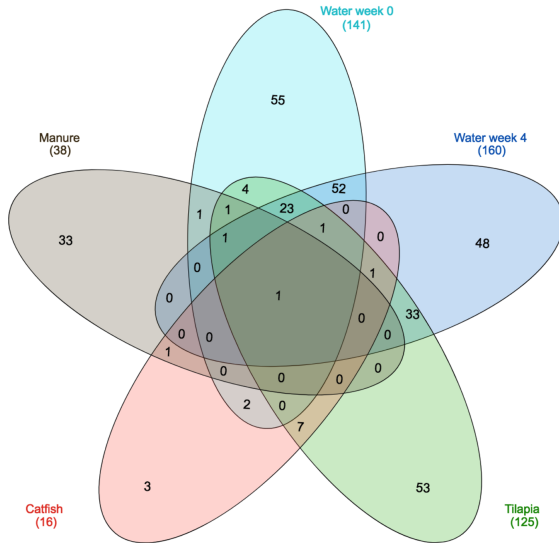

Additional File 2. 16S microbiome summary. (a) Microbial composition (mean, S.E.) across sample types. (b) Core microbes present in at least 75% of samples from an environment type compared to other environment types.

**a**

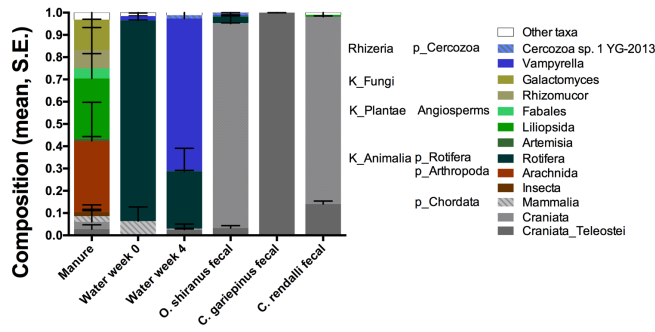

**b**

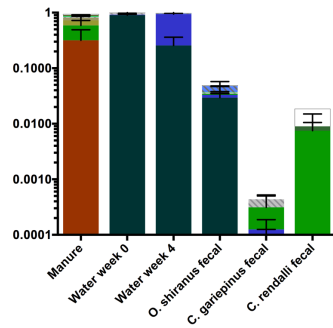

**c**

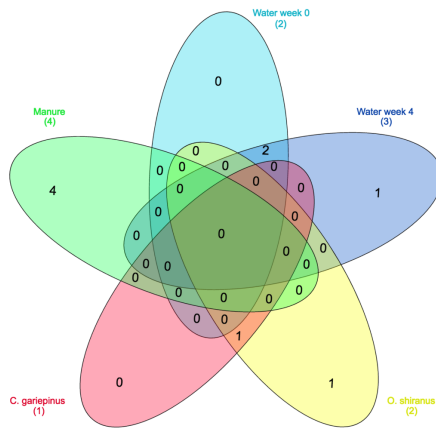

Additional File 3. 18S microbiome summary. (a) Total and (b) host depleted 18S microbial composition (mean, S.E.) across sample types. (c) Core microbes present in at least 75% of samples from an environment type compared to other environment types.

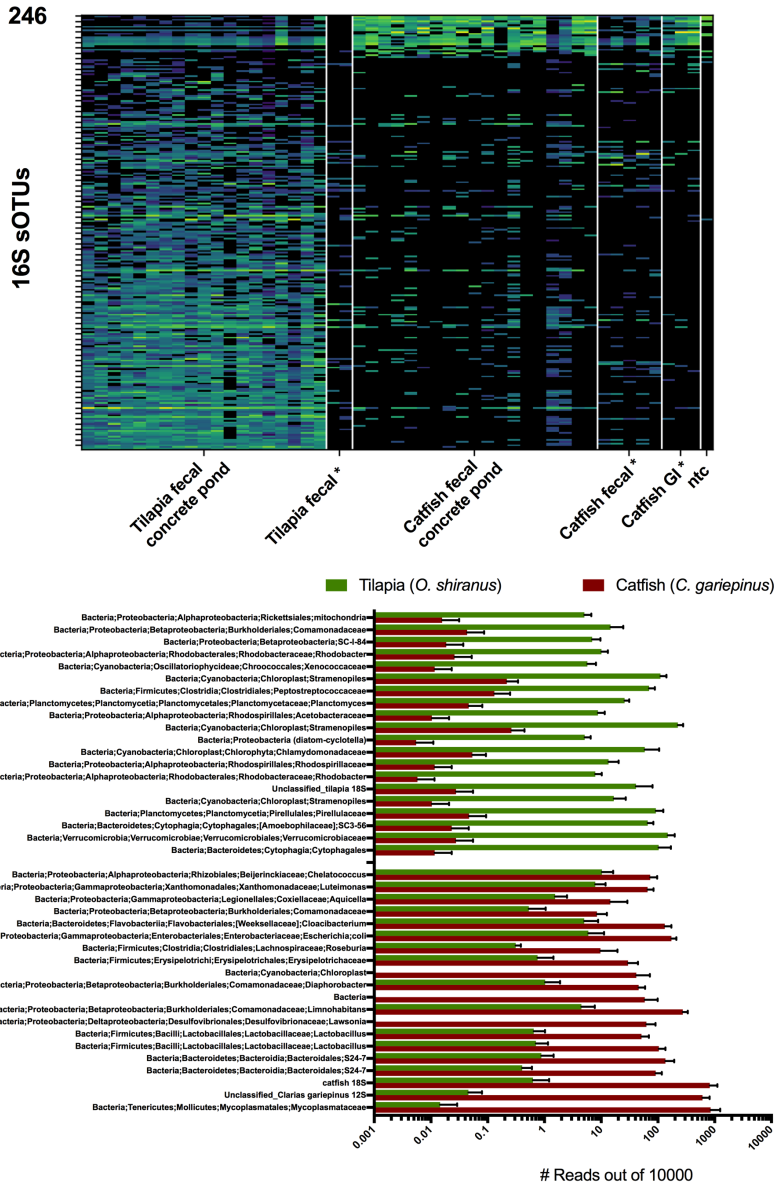

Additional File 4. Differential abundance 16S sOTUs of tilapia (*O. shiranus*) vs. catfish (*C. gariepinus*). (a) 246 total 16S sOTUs differentially abundant between tilapia and catfish. (b) Top 20 tilapia and catfish associated 16S sOTUs as ranked by difference in ratio.

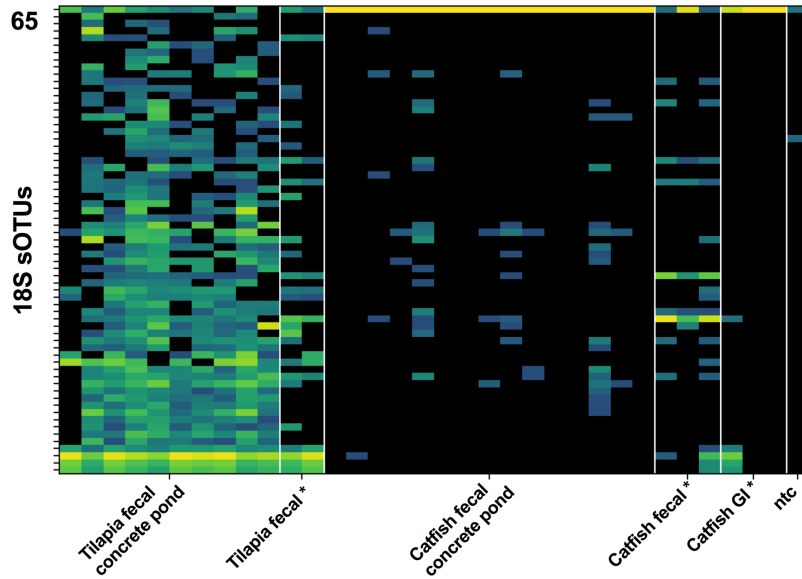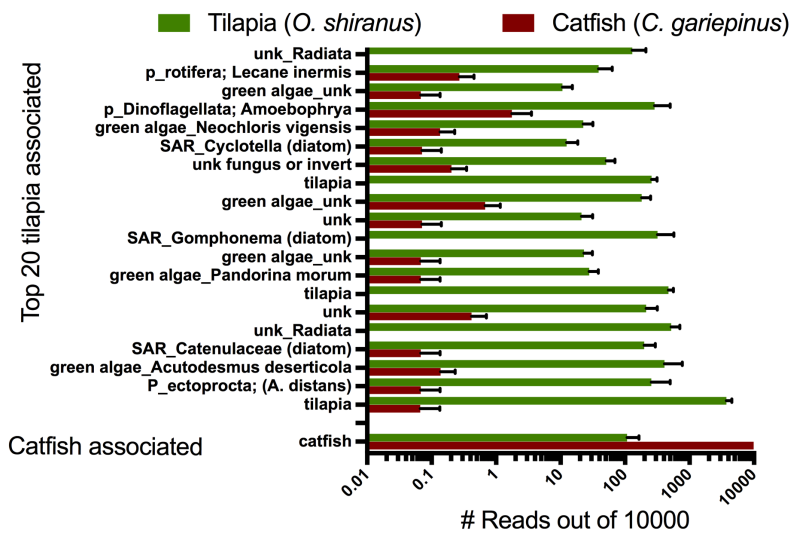

Additional File 5. Differential abundance 18S sOTUs of tilapia (*O. shiranus*) vs. catfish (*C. gariepinus*). (a) 65 total 18S sOTUs differentially abundant between tilapia and catfish. (b) Top 20 tilapia and 1 catfish associated 18S sOTUs as ranked by difference in ratio.

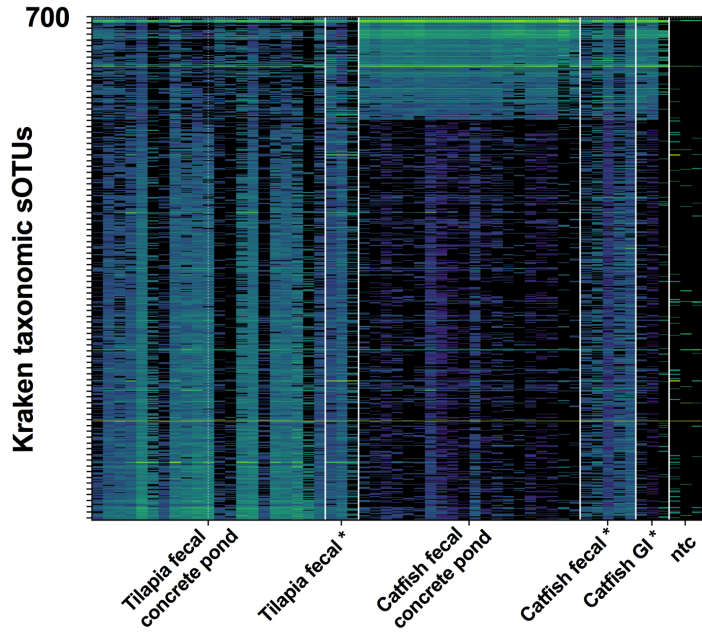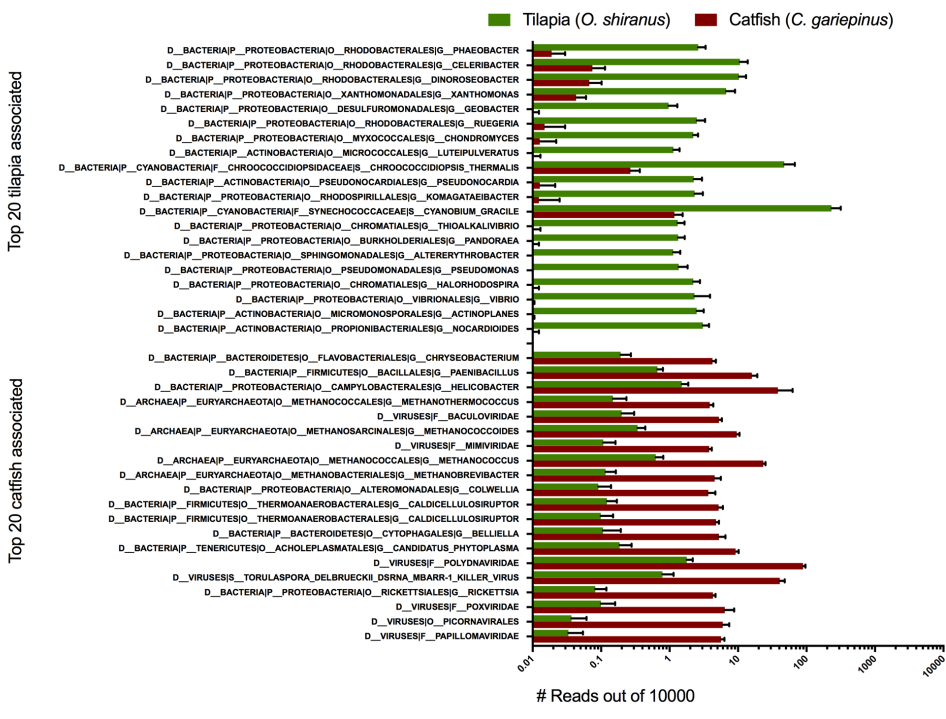

Additional File 6. Differential abundance WGSS taxonomic sOTUs of tilapia (*O. shiranus*) vs. catfish (*C. gariepinus*). (a) 700 total WGSS sOTUs differentially abundant between tilapia and catfish. (b) Top 20 tilapia and catfish associated WGSS sOTUs as ranked by difference in ratio.
